# Supplementary material
Source: Elsevier journal article supplement (https://www.sciencedirect.com/science/article/pii/S1888989122000301)
Supplement: mmc1 [file S1888989122000301:mmc1.doc]

| **Table S1. World Health Organization Member States per region** | |
| --- | --- |
| **REGION** | **MEMBER STATES** |
| *Africa* | Seychelles  Mauritius  South_Africa  Algeria  Botswana  Equatorial Guinea  Gabon  Namibia  Cabo_Verde  Angola  Cameroon  Congo  Cote_d'Ivoire  Eswatini  Ghana  Kenya  Lesotho  Mauritania  Nigeria  Sao Tome and Principe  Zambia  Benin  Burkina_Faso  Burundi  Central African Republic  Chad  Comoros  Democratic Republic of the Congo  Eritrea  Ethiopia  Gambia  Guinea  Guinea Bissau  Liberia  Madagascar  Malawi  Mali  Mozambique  Niger  Rwanda  Senegal  Sierra Leone  South Sudan  Togo  Uganda  United Republic of Tanzania  Zimbabwe |
| *Americas* | Bahamas  Canada  Chile  Trinidad and Tobago  United States of America  Barbados  Uruguay  Saudi Arabia  Brazil  Cuba  Grenada  Mexico  Saint Vicent and the Grenadines  Argentina  Belize  Colombia  Costa Rica  Ecuador  Guyana  Panama  Paraguay  Saint Lucia  Suriname  Venezuela  Dominican Republic  Jamaica  Peru  Guatemala  Nicaragua  El Salvador  Bolivia  Honduras  Haiti |
| *South-East Asia* | Tunisia  Bahrain  Kuwait  Qatar  United Arab Emirates  Oman  Iran  Iraq  Lebanon  Libya  Egypt  Jordan  Syrian Arab Republic  Djibouti  Morocco  Pakistan  Sudan  Yemen  Afghanistan  Somalia |
| *Europe* | Austria  Belgium  Czechia  Denmark  Estonia  Finland  France  Germany  Hungary  Iceland  Ireland  Israel  Italy  Latvia  Lithuania  Luxembourg  Malta  Netherlands  Norway  Slovakia  Slovenia  Spain  Sweden  Switzerland  United Kingdom  Greece  Poland  Portugal  Cyprus  Croatia  North Macedonia  Romania  Belarus  Bulgaria  Kazakhstan  Russian Federation  Serbia  Turkey  Albania  Azerbaijan  Bosnia and Herzegovina  Montenegro  Turkeminstan  Armenia  Republic of Moldova  Uzbekistan  Ukraine  Georgia  Tajikistan |
| *Eastern Mediterranean* | Timor Leste  Maldives  Thailand  Bangladesh  Bhutan  India  Indonesia  Myanmar  Sri Lanka  Nepal |
| *Western Pacific* | Australia  Brunei Darussalam  Japan  New_Zealand  Singapore  Fiji  China  Malaysia  Samoa  Tonga  Philippines  Republic of Korea  Kiribati  Mongolia  Cambodia  Lao People's Democratic Republic  Micronesia  Papua New Guinea  Solomon Islands  Vanuatu  Viet Nam |
